# Supplementary material
Source: bioRxiv or medRxiv preprint supplement (https://medrxiv.org/highwire/filestream/80649/field_highwire_adjunct_files/9/2020.05.08.20095943-9.pdf)

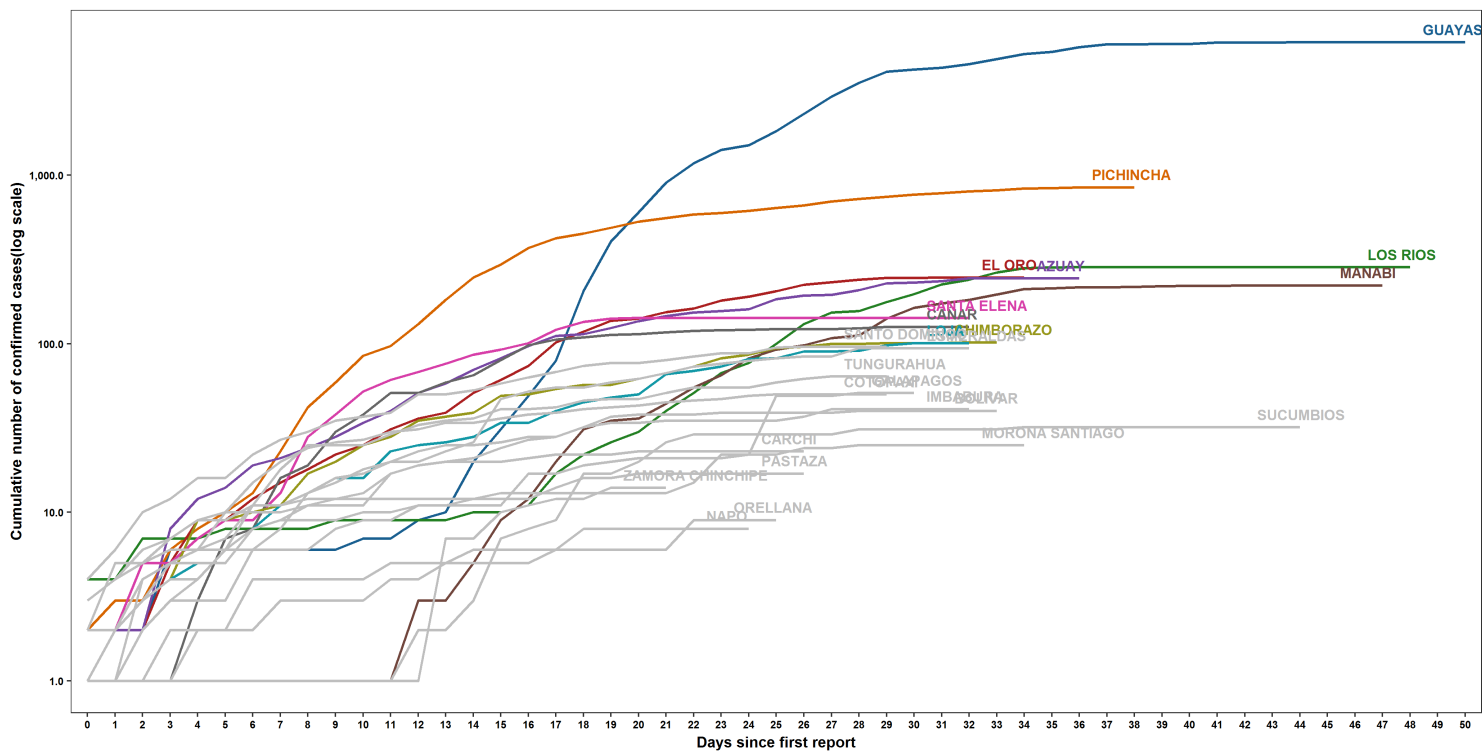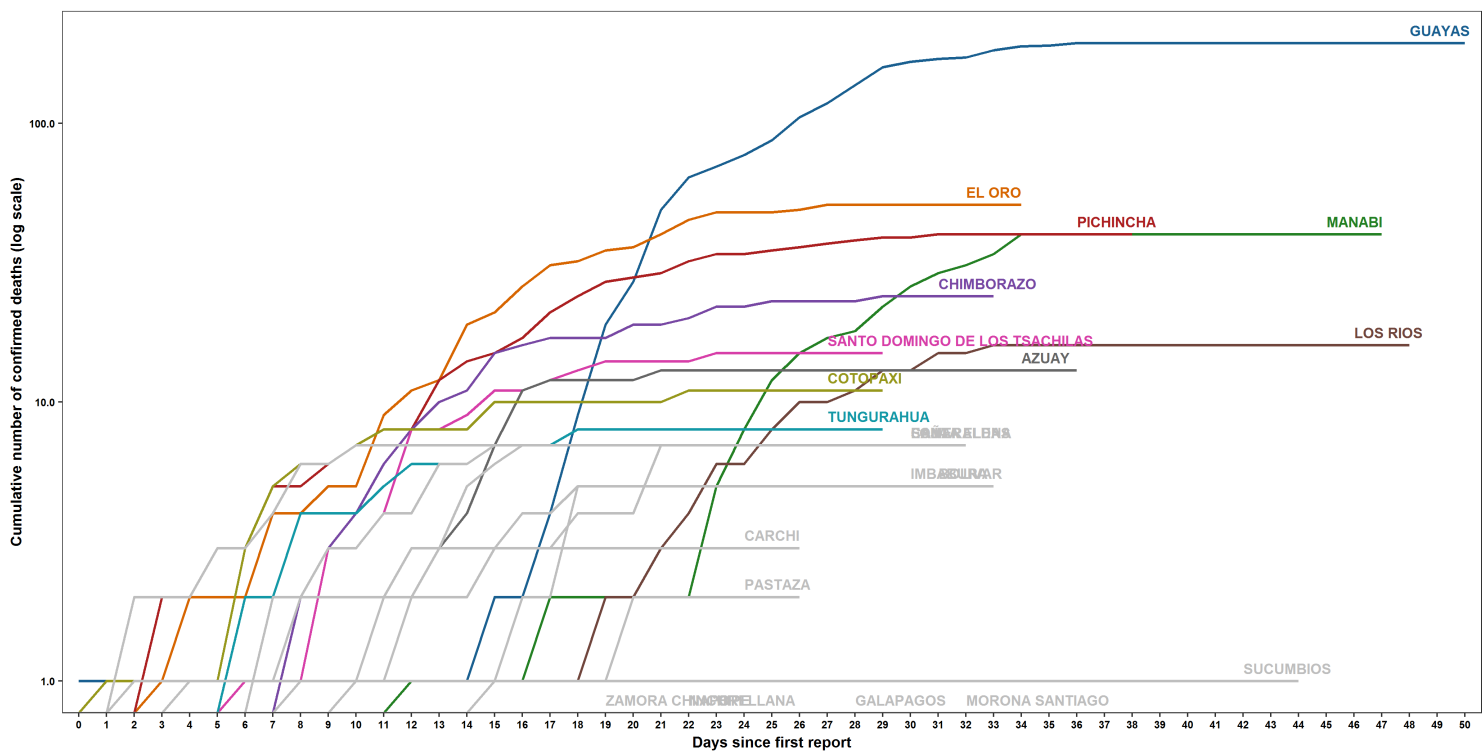

Supplement: Supplementary file [file 2020.05.08.20095943-9.pdf]
